# Supplementary material for: Deep representation features from DreamDIAXMBD improve the analysis of data-independent acquisition proteomics
Source: PubMed Central journal article supplement (PMC8517002; doi:10.1038/s42003-021-02726-6), 2021-10-14
Supplement: 42003_2021_2726_MOESM3_ESM.pdf [file 42003_2021_2726_MOESM3_ESM.pdf]

## Description of Additional Supplementary Files

**File name:** Supplementary Data 1

**Description:** Source data for Figure 2a.

**File name:** Supplementary Data 2

**Description:** Source data for Figure 2b.

**File name:** Supplementary Data 3

**Description:** Source data for Figure 3.

**File name:** Supplementary Data 4

**Description:** Source data for Figure 4a.

**File name:** Supplementary Data 5

**Description:** Source data for Figure 4b.
